# Supplementary material
Source: MDPI journal article supplement (https://www.mdpi.com/2306-5338/10/9/182)
Supplement: s1 [file s1]

## SUPPLEMENTARY MATERIAL 2

Table S2. Search criteria and Boolean operators applied to Web of Science and ScienceDirect databases. (Porous media aquifers)

|                      |                                                                                                            |
|----------------------|------------------------------------------------------------------------------------------------------------|
| <b>Group 1</b>       | (Groundwater contamination OR groundwater vulnerability OR aquifer vulnerability OR Groundwater pollution) |
| <b>AND</b>           |                                                                                                            |
| <b>Group 2</b>       | (Spatiotemporal OR Temporal OR Spatial-temporal OR Spatio-temporal)                                        |
| <b>NOT</b>           |                                                                                                            |
| <b>Group 3</b>       | (health)                                                                                                   |
| <b>Document Type</b> |                                                                                                            |
| <b>Group 4</b>       | Article only                                                                                               |
| <b>Timespan</b>      |                                                                                                            |
| <b>Group 4</b>       | 2010-2021                                                                                                  |

Table S3. Search criteria and Boolean operators applied to Web of Science and ScienceDirect databases. (Karst aquifers)

|                      |                                                                   |
|----------------------|-------------------------------------------------------------------|
| <b>Group 1</b>       | ("karst groundwater" OR "karst aquifers")                         |
| <b>AND</b>           |                                                                   |
| <b>Group 2</b>       | (Vulnerability OR contamination OR pollution)                     |
| <b>AND</b>           |                                                                   |
|                      | (Spatiotemporal OR Temporal OR time-dependent OR spatio-temporal) |
| <b>NOT</b>           |                                                                   |
| <b>Group 3</b>       | (health)                                                          |
| <b>Document Type</b> |                                                                   |
| <b>Group 4</b>       | Article only                                                      |
| <b>Timespan</b>      |                                                                   |
| <b>Group 4</b>       | 2001-2021                                                         |

Table S4. Exclusion criteria followed by PRISMA for the need of this review.

|                                                                                      |
|--------------------------------------------------------------------------------------|
| <b>Stage1:</b> Screening the list of gathered samples from all sources (on MS Excel) |
| Remove duplicates                                                                    |
| <b>Stage2:</b> Screening Titles and Abstracts                                        |
| Not related to GW contamination                                                      |
| Soil pollution                                                                       |
| Forest & Wetland pollution                                                           |
| watershed dynamics & catchment management                                            |
| Riverbank morphology and filtration                                                  |
| Soil and surface water dynamics                                                      |
| GW quantitative vulnerability                                                        |
| GW management & remediation                                                          |
| <b>Stage3:</b> Screening full text                                                   |
| Not related to modelling                                                             |
| In situ field observations                                                           |
| Coastal Aquifers & GW Salinity                                                       |
| Natural hazard                                                                       |
| Manmade hazard (Oil & gas exploration and mining)                                    |
| Microbial or viral pollution                                                         |
| Review papers (Included in introduction)                                             |
| Not accessible                                                                       |
