# Supplementary material
Source: MDPI journal article supplement (https://www.mdpi.com/2306-5338/10/9/182)
Supplement: s1 [file s1]

1 Table S1. Widely used Overlay and Index-based modelling techniques

|   | Method  | Source             | Equation                                                                                                                                                                                                             | Details of Weight and Rating Systems |                                              |           |
|---|---------|--------------------|----------------------------------------------------------------------------------------------------------------------------------------------------------------------------------------------------------------------|--------------------------------------|----------------------------------------------|-----------|
|   |         |                    |                                                                                                                                                                                                                      | Feature                              |                                              | Weight    |
| 1 | DRASTIC | Aller et al., 1987 | $DRASTIC_{Index} = \sum_{i=1}^7 WiRi$ <p><math>W_i</math> and <math>R_i</math>=weight and rating for the <math>i^{th}</math> parameter, respectively.</p>                                                            | D                                    | Depth to water                               | 5         |
|   |         |                    |                                                                                                                                                                                                                      | R                                    | Recharge                                     | 4         |
|   |         |                    |                                                                                                                                                                                                                      | A                                    | Aquifer media                                | 3         |
|   |         |                    |                                                                                                                                                                                                                      | S                                    | Soil media                                   | 2         |
|   |         |                    |                                                                                                                                                                                                                      | T                                    | Topography slope                             | 1         |
|   |         |                    |                                                                                                                                                                                                                      | I                                    | Impact of vadose zone                        | 5         |
|   |         |                    |                                                                                                                                                                                                                      | C                                    | Conductivity of the aquifer                  | 3         |
| 2 | GOD     | Foster, 1987       | $GOD_{Index} = GR \times OR \times DR$ <p>G=groundwater occurrence including recharge, O=overlying lithology, and D=depth to groundwater of the method explained ahead, and subscript R=rating of the parameters</p> | GOD Parameter                        |                                              | Rating    |
|   |         |                    |                                                                                                                                                                                                                      | (G)W confinement                     | Non aquifer                                  | 0         |
|   |         |                    |                                                                                                                                                                                                                      |                                      | Artesian                                     | 0.1       |
|   |         |                    |                                                                                                                                                                                                                      |                                      | Confined                                     | 0.2       |
|   |         |                    |                                                                                                                                                                                                                      |                                      | Semiconfined                                 | 0.3       |
|   |         |                    |                                                                                                                                                                                                                      |                                      | Unconfined with cover                        | 0.4 - 0.6 |
|   |         |                    |                                                                                                                                                                                                                      |                                      | Unconfined                                   | 0.7 - 1   |
|   |         |                    |                                                                                                                                                                                                                      | (O)verlying strata                   | Residual soil                                | 0.4       |
|   |         |                    |                                                                                                                                                                                                                      |                                      | Limon alluvial; loess; shale, fine limestone | 0.5       |
|   |         |                    |                                                                                                                                                                                                                      |                                      | Aeolian sand; siltite; tuff; igneous rock    | 0.6       |
|   |         |                    |                                                                                                                                                                                                                      |                                      | Sand and gravel; sandstone                   | 0.7       |
|   |         |                    |                                                                                                                                                                                                                      |                                      | Gravel                                       | 0.8       |
|   |         |                    |                                                                                                                                                                                                                      |                                      | Limestone                                    | 0.9       |
|   |         |                    |                                                                                                                                                                                                                      |                                      | Fractured or karstic limestone               | 1         |
|   |         |                    |                                                                                                                                                                                                                      | (D)epth of GW (in m)                 | <2                                           | 1         |
|   |         |                    |                                                                                                                                                                                                                      |                                      | 2-5                                          | 0.9       |
|   |         |                    |                                                                                                                                                                                                                      |                                      | 5-10                                         | 0.8       |
|   |         |                    |                                                                                                                                                                                                                      |                                      | 10-20                                        | 0.7       |
|   |         |                    |                                                                                                                                                                                                                      |                                      | 20-50                                        | 0.6       |

|   |      |                             |                                                                                                                                                                                                                                                                                                                                                                                                                                                                                                                                                                                                                                                                                                                                                                                                                                                                                                                                        |                             |        |           |                     |
|---|------|-----------------------------|----------------------------------------------------------------------------------------------------------------------------------------------------------------------------------------------------------------------------------------------------------------------------------------------------------------------------------------------------------------------------------------------------------------------------------------------------------------------------------------------------------------------------------------------------------------------------------------------------------------------------------------------------------------------------------------------------------------------------------------------------------------------------------------------------------------------------------------------------------------------------------------------------------------------------------------|-----------------------------|--------|-----------|---------------------|
|   |      |                             |                                                                                                                                                                                                                                                                                                                                                                                                                                                                                                                                                                                                                                                                                                                                                                                                                                                                                                                                        |                             | 50-100 | 0.5       |                     |
|   |      |                             |                                                                                                                                                                                                                                                                                                                                                                                                                                                                                                                                                                                                                                                                                                                                                                                                                                                                                                                                        |                             | >100   | 0.4       |                     |
| 3 | AVI  | Van Stempvoort et al., 1993 | $c = \sum_{i=1}^n \frac{d_i}{k_i}$<br>c = the hydraulic resistance given by AVI rating system; n = number of sedimentary units above the aquifer; d = thickness of each sedimentary unit, and k = estimated hydraulic conductivity of each sedimentary unit.                                                                                                                                                                                                                                                                                                                                                                                                                                                                                                                                                                                                                                                                           | Hydraulic resistance (year) |        | Log (c)   | Vulnerability (AVI) |
|   |      |                             |                                                                                                                                                                                                                                                                                                                                                                                                                                                                                                                                                                                                                                                                                                                                                                                                                                                                                                                                        | 0–10                        |        | <1        | Extremely high      |
|   |      |                             |                                                                                                                                                                                                                                                                                                                                                                                                                                                                                                                                                                                                                                                                                                                                                                                                                                                                                                                                        | 10–100                      |        | 1-2       | High                |
|   |      |                             |                                                                                                                                                                                                                                                                                                                                                                                                                                                                                                                                                                                                                                                                                                                                                                                                                                                                                                                                        | 100–1,000                   |        | 2-3       | Moderate            |
|   |      |                             |                                                                                                                                                                                                                                                                                                                                                                                                                                                                                                                                                                                                                                                                                                                                                                                                                                                                                                                                        | 1,000–10,000                |        | 3-4       | Low                 |
|   |      |                             |                                                                                                                                                                                                                                                                                                                                                                                                                                                                                                                                                                                                                                                                                                                                                                                                                                                                                                                                        | >10,000                     |        | >4        | Extremely low       |
| 4 | ISIS | Civita & Regibus, 1995      | $I_v = (R_{inf} \times C_{inf}) + (R_{su} \times C_{sus} \times C_{su}) + (R_{ins} \times C_{si} \times C_{ins}) + (R_{sat} \times C_{ss} \times C_{sat})$<br><br>R <sub>inf</sub> = rating values for ranges of the net recharge; C <sub>inf</sub> = infiltration coefficient dependent on land use; R <sub>su</sub> = rating values for the soil media; C <sub>sus</sub> = soil coefficient dependent on land use; C <sub>su</sub> = weighting coefficient dependent on soil thickness; R <sub>ins</sub> = rating values assigned to the vadose zone; C <sub>si</sub> = weighting coefficient dependent on the unsaturated-zone lithology and thickness; C <sub>ins</sub> = vadose zone coefficient dependent on land use; R <sub>sat</sub> = rating values assigned to aquifer media; C <sub>ss</sub> = weighting coefficient dependent on the aquifer thickness; and C <sub>sat</sub> = aquifer coefficient dependent on land use. | Range                       |        | Index     |                     |
|   |      |                             |                                                                                                                                                                                                                                                                                                                                                                                                                                                                                                                                                                                                                                                                                                                                                                                                                                                                                                                                        | 141–180                     |        | Extreme   |                     |
|   |      |                             |                                                                                                                                                                                                                                                                                                                                                                                                                                                                                                                                                                                                                                                                                                                                                                                                                                                                                                                                        | 124–140                     |        | Very high |                     |
|   |      |                             |                                                                                                                                                                                                                                                                                                                                                                                                                                                                                                                                                                                                                                                                                                                                                                                                                                                                                                                                        | 88–123                      |        | High      |                     |
|   |      |                             |                                                                                                                                                                                                                                                                                                                                                                                                                                                                                                                                                                                                                                                                                                                                                                                                                                                                                                                                        | 64–87                       |        | Medium    |                     |
|   |      |                             |                                                                                                                                                                                                                                                                                                                                                                                                                                                                                                                                                                                                                                                                                                                                                                                                                                                                                                                                        | 44–63                       |        | Low       |                     |
|   |      |                             |                                                                                                                                                                                                                                                                                                                                                                                                                                                                                                                                                                                                                                                                                                                                                                                                                                                                                                                                        | 24–43                       |        | Very low  |                     |

|   |         |                           |                                                                                                                                                                                                                                                                                                                                                                                                                                                                               |                                               |                                                                                 |                              |                    |                                                         |                    |
|---|---------|---------------------------|-------------------------------------------------------------------------------------------------------------------------------------------------------------------------------------------------------------------------------------------------------------------------------------------------------------------------------------------------------------------------------------------------------------------------------------------------------------------------------|-----------------------------------------------|---------------------------------------------------------------------------------|------------------------------|--------------------|---------------------------------------------------------|--------------------|
| 5 | SINTACS | Civita & Maio, 1997       | $I_v = \sum_{i=1}^7 \sum_{j=1}^n (P_i \times W_j)$ <p>P<sub>i</sub> = rating of the i<sup>th</sup> parameter, and W<sub>j</sub> = associated weight of the j<sup>th</sup> weight classification.</p>                                                                                                                                                                                                                                                                          | Parameter                                     |                                                                                 | Weight                       |                    |                                                         |                    |
|   |         |                           |                                                                                                                                                                                                                                                                                                                                                                                                                                                                               | S                                             | Soggiacenza (depth to water)                                                    | 5                            |                    |                                                         |                    |
|   |         |                           |                                                                                                                                                                                                                                                                                                                                                                                                                                                                               | I                                             | Infiltrazione efficace (net recharge)                                           | 4                            |                    |                                                         |                    |
|   |         |                           |                                                                                                                                                                                                                                                                                                                                                                                                                                                                               | N                                             | Non-saturo–efecto di autodepurazione del- (impact of vadose zone)               | 5                            |                    |                                                         |                    |
|   |         |                           |                                                                                                                                                                                                                                                                                                                                                                                                                                                                               | T                                             | Tipología della copertura (type of soil cover)                                  | 4                            |                    |                                                         |                    |
|   |         |                           |                                                                                                                                                                                                                                                                                                                                                                                                                                                                               | A                                             | Acquifero–caratteristiche idrogeologiche del- (lithology of the aquifer)        | 3                            |                    |                                                         |                    |
|   |         |                           |                                                                                                                                                                                                                                                                                                                                                                                                                                                                               | C                                             | Conducibilità hidráulica dell’acquifero (hydraulic conductivity of the aquifer) | 3                            |                    |                                                         |                    |
|   |         |                           |                                                                                                                                                                                                                                                                                                                                                                                                                                                                               | S                                             | Superficie topográfica–acclività della- (slope)                                 | 2                            |                    |                                                         |                    |
| 6 | EPIK    | Doerfliger et al., 1999   | $Fp_i = aE_i + bP_i + cI_i + dK_i$ <p>Fp<sub>i</sub> = protection factor pertaining to the i<sup>th</sup> cell; E<sub>i</sub>, P<sub>i</sub>, I<sub>i</sub>, K<sub>i</sub> = weights considered for the i<sup>th</sup> cell (range of parameters depending upon their impact on the pollution potential are given in Doerfliger et al., 1999); a, b, c, d = attribute relative weights having values of 3, 1, 3 and 2, respectively; and i = 1, .., n (grid cell number).</p> | Parameter                                     |                                                                                 | Weight                       |                    |                                                         |                    |
|   |         |                           |                                                                                                                                                                                                                                                                                                                                                                                                                                                                               | E                                             | Epikarst (α)                                                                    | 3                            |                    |                                                         |                    |
|   |         |                           |                                                                                                                                                                                                                                                                                                                                                                                                                                                                               | P                                             | Protective cover (β)                                                            | 1                            |                    |                                                         |                    |
|   |         |                           |                                                                                                                                                                                                                                                                                                                                                                                                                                                                               | I                                             | Infiltration conditions (γ)                                                     | 3                            |                    |                                                         |                    |
|   |         |                           |                                                                                                                                                                                                                                                                                                                                                                                                                                                                               | K                                             | Karst network development (δ)                                                   | 2                            |                    |                                                         |                    |
| 7 | PI      | Goldscheider et al., 2000 | $p = P \times I$ <p>p = protection factor, P = protective cover, and I = infiltration conditions.</p>                                                                                                                                                                                                                                                                                                                                                                         | P-map<br>Effectiveness of<br>Protective Cover |                                                                                 | I-map<br>Degree of Bypassing |                    | Vulnerability Map<br>Vulnerability of uppermost Aquifer |                    |
|   |         |                           |                                                                                                                                                                                                                                                                                                                                                                                                                                                                               | P-factor                                      | verbal description                                                              | I-factor                     | verbal description | π-factor                                                | verbal description |
|   |         |                           |                                                                                                                                                                                                                                                                                                                                                                                                                                                                               | 1                                             | very high                                                                       | 0-0.2                        | very high          | 0-1                                                     | extreme            |
|   |         |                           |                                                                                                                                                                                                                                                                                                                                                                                                                                                                               | 2                                             | high                                                                            | 0.4                          | high               | >1-2                                                    | high               |
|   |         |                           |                                                                                                                                                                                                                                                                                                                                                                                                                                                                               | 3                                             | moderate                                                                        | 0.6                          | moderate           | >2-3                                                    | moderate           |
|   |         |                           |                                                                                                                                                                                                                                                                                                                                                                                                                                                                               | 4                                             | low                                                                             | 0.8                          | low                | >3-4                                                    | low                |
|   |         |                           |                                                                                                                                                                                                                                                                                                                                                                                                                                                                               | 5                                             | very low                                                                        | 1.0                          | very low           | >4-5                                                    | very low           |

|    |         |                           |                                                                                                                                                                                                                                                                                        |                                  |                                                                      |                                  |                         |                                                      |                         |                          |                         |
|----|---------|---------------------------|----------------------------------------------------------------------------------------------------------------------------------------------------------------------------------------------------------------------------------------------------------------------------------------|----------------------------------|----------------------------------------------------------------------|----------------------------------|-------------------------|------------------------------------------------------|-------------------------|--------------------------|-------------------------|
| 8  | GALDIT  | Chachadi & Ferreira, 2005 | $GALDIT\ Index = \frac{\sum_{i=1}^6(W_i \times R_i)}{\sum_{i=1}^6 W_i}$<br><br>W <sub>i</sub> = weight of the i <sup>th</sup> indicator, and R <sub>i</sub> =rating of the i <sup>th</sup> indicator.                                                                                  | Parameter                        |                                                                      |                                  |                         |                                                      |                         | Weight                   |                         |
|    |         |                           |                                                                                                                                                                                                                                                                                        | G                                | Groundwater Occurrence (Aquifer Type)                                |                                  |                         |                                                      |                         |                          | 1                       |
|    |         |                           |                                                                                                                                                                                                                                                                                        | A                                | Aquifer Hydraulic Conductivity                                       |                                  |                         |                                                      |                         |                          | 3                       |
|    |         |                           |                                                                                                                                                                                                                                                                                        | L                                | Height of Groundwater Level above Sea Level                          |                                  |                         |                                                      |                         |                          | 4                       |
|    |         |                           |                                                                                                                                                                                                                                                                                        | D                                | Distance from the Shore                                              |                                  |                         |                                                      |                         |                          | 4                       |
|    |         |                           |                                                                                                                                                                                                                                                                                        | I                                | Impact of existing status of Seawater Intrusion                      |                                  |                         |                                                      |                         |                          | 1                       |
|    |         |                           |                                                                                                                                                                                                                                                                                        | T                                | Thickness of Aquifer being Mapped                                    |                                  |                         |                                                      |                         |                          | 2                       |
| 9  | COP     | Vías et al., 2006         | $COP_{index} = C \times O \times P$<br><br>COP <sub>index</sub> = intrinsic vulnerability of the karst aquifer, C = concentration, O = overlying layers, and P = precipitation.                                                                                                        | O Factor (Overlying layers)      |                                                                      | C Factor (Concentration of flow) |                         | P Factor (Precipitation)                             |                         | COP Index                | Vulnerability classes   |
|    |         |                           |                                                                                                                                                                                                                                                                                        | O Score                          | Protection value                                                     | C Score                          | Reduction of protection | P Score                                              | Reduction of protection |                          |                         |
|    |         |                           |                                                                                                                                                                                                                                                                                        | 1                                | Very low                                                             | 0-0.2                            | Very high               | 0.4-0.5                                              | Very high               | 0-0.5                    | Very high               |
|    |         |                           |                                                                                                                                                                                                                                                                                        | 2                                | Low                                                                  | 0.2-0.4                          | High                    | 0.6                                                  | High                    | 0.5-1                    | High                    |
|    |         |                           |                                                                                                                                                                                                                                                                                        | 2-4                              | Moderate                                                             | 0.4-0.6                          | Moderate                | 0.7                                                  | Moderate                | 1-2                      | Moderate                |
|    |         |                           |                                                                                                                                                                                                                                                                                        | 4-8                              | High                                                                 | 0.6-0.8                          | Low                     | 0.8                                                  | Low                     | 2-4                      | Low                     |
|    |         |                           |                                                                                                                                                                                                                                                                                        | 8-15                             | Very high                                                            | 0.8-1.0                          | Very low                | 0.9-1.0                                              | Very low                | 4-15                     | Very low                |
| 10 | PaPRIKa | Dorfliger & Plagnes, 2009 | $V_g = (i \times I) + (r \times R) + (p \times P) + (k \times Ka)$<br><br>V <sub>g</sub> =resource vulnerability map, P=protection factor, R=reservoir factor, I=infiltration factor, and Ka=karstification factor, and i, r, p and k are affecting weights with their sum equal to 1. | Factor                           |                                                                      |                                  |                         | Rating (%)                                           |                         |                          |                         |
|    |         |                           |                                                                                                                                                                                                                                                                                        |                                  |                                                                      |                                  |                         | For karst catchment                                  |                         |                          | For non karst catchment |
|    |         |                           |                                                                                                                                                                                                                                                                                        | P                                | Protection (Overlying-layer, Epikarst, soil cover, unsaturated zone) |                                  |                         | 20–25                                                |                         | 50                       |                         |
|    |         |                           |                                                                                                                                                                                                                                                                                        | R                                | Rock type                                                            |                                  |                         | 15–20                                                |                         | -                        |                         |
|    |         |                           |                                                                                                                                                                                                                                                                                        | I                                | Infiltration                                                         |                                  |                         | 40-30                                                |                         | 50                       |                         |
|    |         |                           |                                                                                                                                                                                                                                                                                        | Ka                               | karstification degree                                                |                                  |                         | 20–30                                                |                         | -                        |                         |
| 11 | CORE    | Pavlis & Cummins, 2014    | $CORE_{Score} = O \times C \times R \times E$<br><br>O = Overlying layers; C = Concentrated flow; R = Recharge; E = Extreme events                                                                                                                                                     | Concentration of flow (C factor) |                                                                      | Overlying layers (O factor)      |                         | Precipitation (Rainfall & Extreme events/ RE factor) |                         | CORE vulnerability index |                         |
|    |         |                           |                                                                                                                                                                                                                                                                                        | C Score                          | Reduction of protection                                              | O Score                          | Protection              | RE Score                                             | Reduction of protection |                          |                         |
|    |         |                           |                                                                                                                                                                                                                                                                                        | 0-0.2                            | Very High                                                            | 1                                | Very Low                | 0.4-0.5                                              | Very High               | Very High                |                         |

|  |  |  |  |         |          |     |           |         |          |          |
|--|--|--|--|---------|----------|-----|-----------|---------|----------|----------|
|  |  |  |  | 0.2-0.4 | High     | 2   | Low       | 0.5-0.6 | High     | High     |
|  |  |  |  | 0.4-0.6 | Moderate | 3-5 | Moderate  | 0.6-.07 | Moderate | Moderate |
|  |  |  |  | 0.6-0.8 | Low      | 5-7 | High      | 0.7-0.8 | Low      | Low      |
|  |  |  |  | 0.8-1.0 | Very Low | 8   | Very High | >0.8    | Very Low | Very Low |

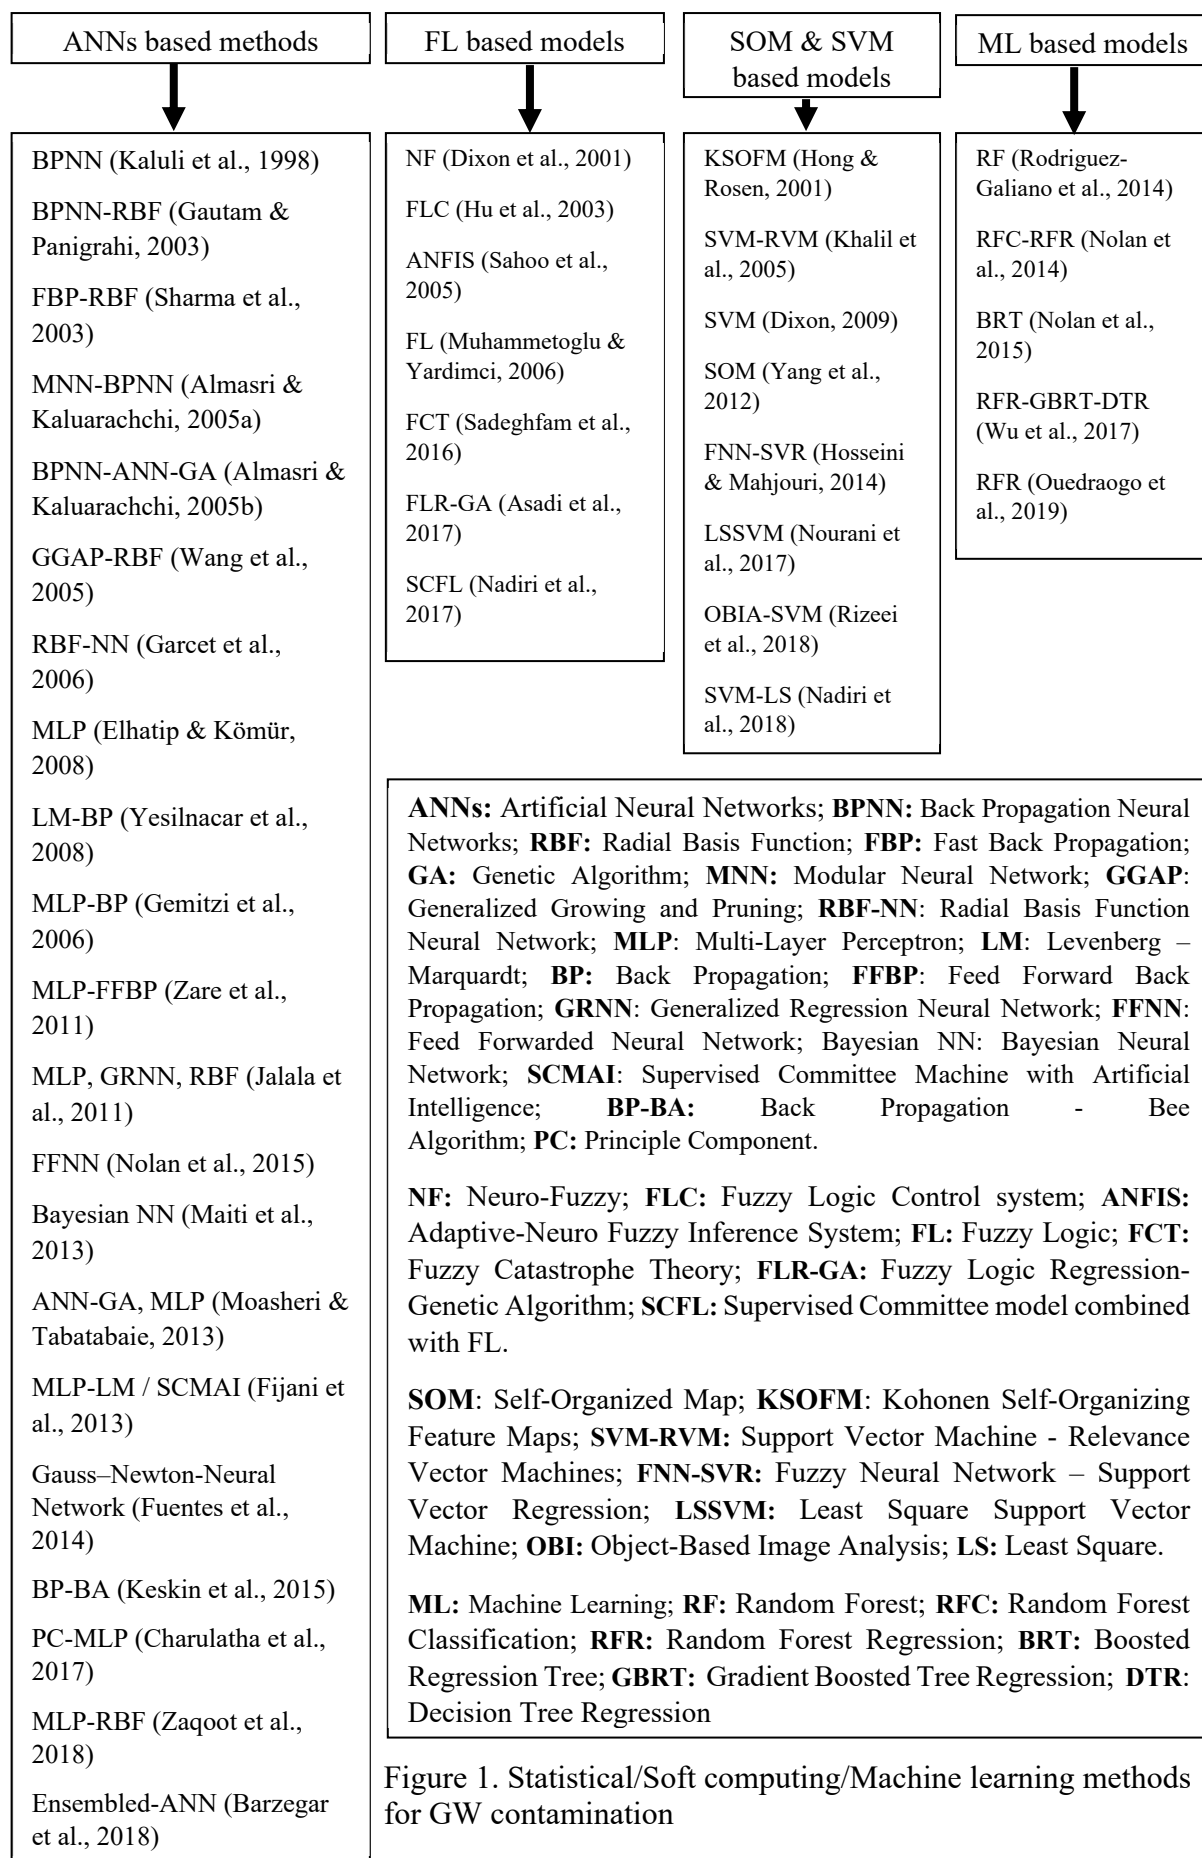

Figure 1. Statistical/Soft computing/Machine learning methods for GW contamination

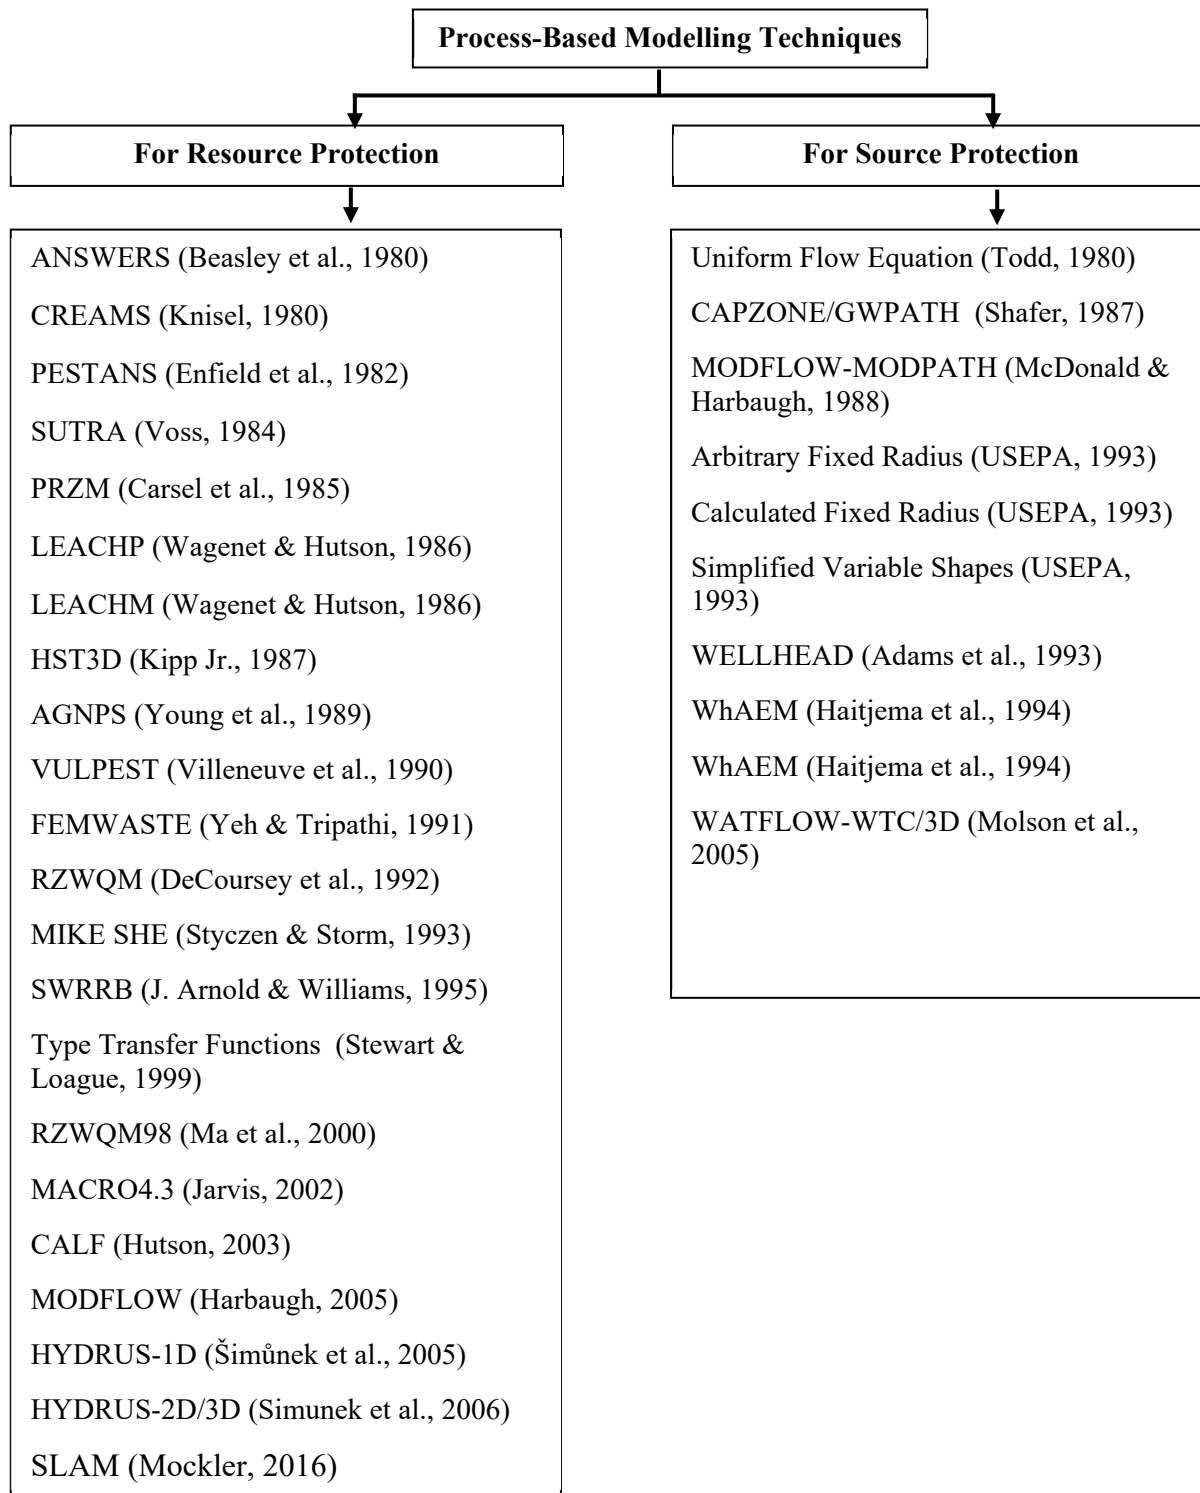

Figure 2. Widely used Process-Based modelling techniques for GW contamination assessment
