# Supplementary material
Source: MDPI journal article supplement (https://www.mdpi.com/2306-5338/10/9/182)
Supplement: s1 [file s1]

Archive with 2 entries (2 files):
- Supplementary Material-1.pdf
- Supplementary Material-2.pdf
